# Supplementary material for: Investigation on the properties and structures of resveratrol-derived epoxy thermosets cured with an active ester
Source: Royal Society of Chemistry journal article supplement (doi:10.1039/d2py01579j), 2023-01-01
Supplement: d2py01579j1.pdf [file d2py01579j1.pdf]

## Supplementary Material

### Investigation on properties and structures of resveratrol-derived epoxy thermosets cured with active ester

Jiaming Liu<sup>a,b,c,d,e</sup>, Xiaohong Liu<sup>a,e</sup>, Xiaohua Cui<sup>a,c,e</sup>, Jingjing Qin<sup>a,e</sup>, Mengqin Wu<sup>a,c,e</sup>, Lifu Fu<sup>a,c,e</sup>,  
Min Shi<sup>a,e</sup>, Dingsong Wang<sup>a,c,e</sup>, Liyan Liang<sup>a,b,c,d,e,†</sup>

a. Guangzhou Institute of Chemistry, Chinese Academy of Sciences, Guangzhou 510650, China.

b. CAS Engineering Laboratory for Special Fine Chemicals, Guangzhou 510650, China.

c. CASH GCC Shaoguan Research Institute of Advanced Materials, Nanxiong 512400, China.

d. Guangdong Provincial Key Laboratory of Organic Polymer Materials for Electronics, Guangzhou 510650, China.

e. University of Chinese Academy of Sciences, Beijing 100049, China.

† Corresponding author at: Guangzhou Institute of Chemistry, Chinese Academy of Sciences, Guangzhou 510650, China. E-mail address: lyliang@gic.ac.cn.

|                                                                                                                                                                                                                                                  |   |
|--------------------------------------------------------------------------------------------------------------------------------------------------------------------------------------------------------------------------------------------------|---|
| Figure S1 Non-isothermal DSC curve of REP. ....                                                                                                                                                                                                  | 1 |
| Figure S2 Non-isothermal DSC curve of TAR .....                                                                                                                                                                                                  | 2 |
| Figure S3 Non-isothermal DSC curve of TTR .....                                                                                                                                                                                                  | 2 |
| Figure S4 Non-isothermal DSC curves of uncured REP/TAR mixture and REP/TTR mixture. ....                                                                                                                                                         | 2 |
| Figure S5 FTIR spectra of REP/MNA.....                                                                                                                                                                                                           | 3 |
| Figure S6 (a) Storage Modulus, (b) loss modulus, (c) $\tan\delta$ curves of the epoxy thermosets from DMA test. ....                                                                                                                             | 3 |
| Figure S7 Thermal expansion curves of (a) REP/TAR and (b) REP/TTR from TMA test.....                                                                                                                                                             | 4 |
| Figure S8 TG curves and Conversed curves of epoxy thermosets. ....                                                                                                                                                                               | 4 |
| Figure S9 Absorbance intensities of characteristic peaks (at (a) $1600\text{ cm}^{-1}$ ; (b) $2180\text{ cm}^{-1}$ ; (c) $3580\text{ cm}^{-1}$ ; (d) $3650\text{ cm}^{-1}$ ) versus temperature curves of epoxy thermosets from TG-IR test. .... | 5 |
| Figure S10 Dielectric constant of REP/MNA. ....                                                                                                                                                                                                  | 5 |
| Figure S11 Water absorptions rate of REP/TAR, REP/TTR and REP/MNA. ....                                                                                                                                                                          | 6 |
| Table S1 DMA data of the epoxy thermosets.....                                                                                                                                                                                                   | 3 |
| Table S2 Examples of conversion of vertical coordinate (REP/TAR). ....                                                                                                                                                                           | 4 |
| Table S3 Water absorptions rate of REP/TAR, REP/TTR and REP/MNA .....                                                                                                                                                                            | 6 |

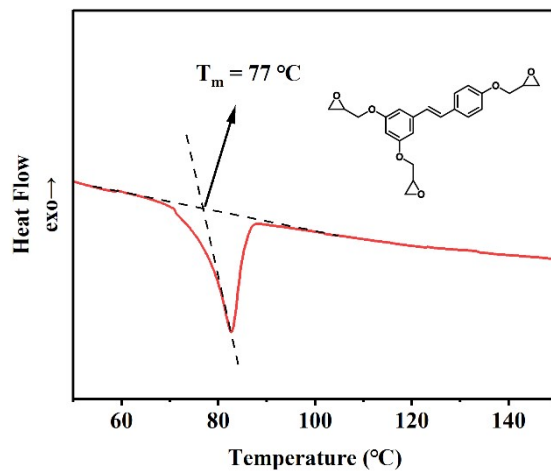

Figure S1 Non-isothermal DSC curve of REP.

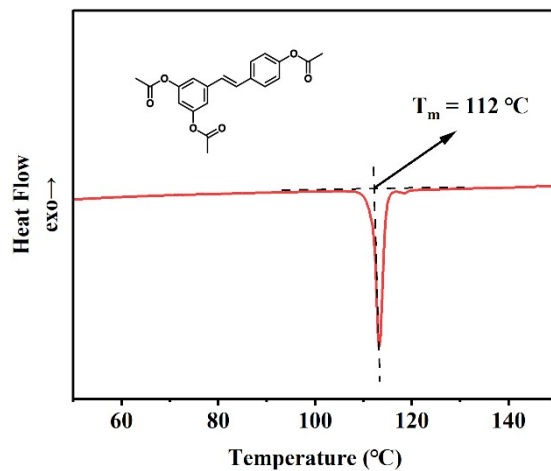

Figure S2 Non-isothermal DSC curve of TAR .

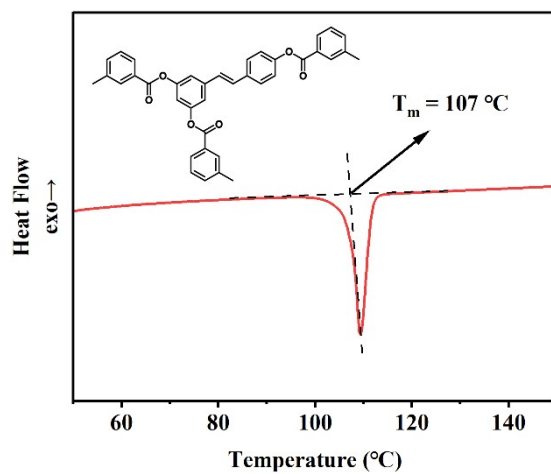

Figure S3 Non-isothermal DSC curve of TTR .

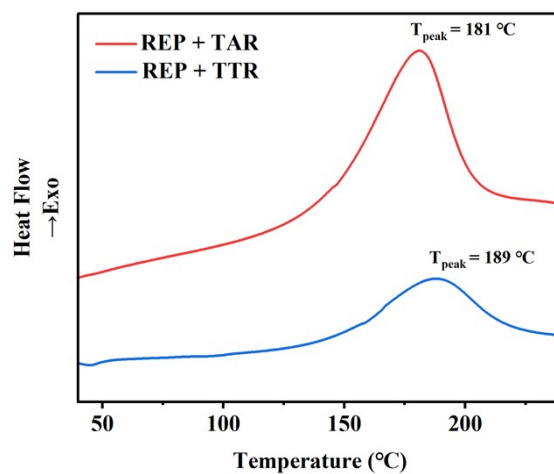

Figure S4 Non-isothermal DSC curves of uncured REP/TAR mixture and REP/TTR mixture.

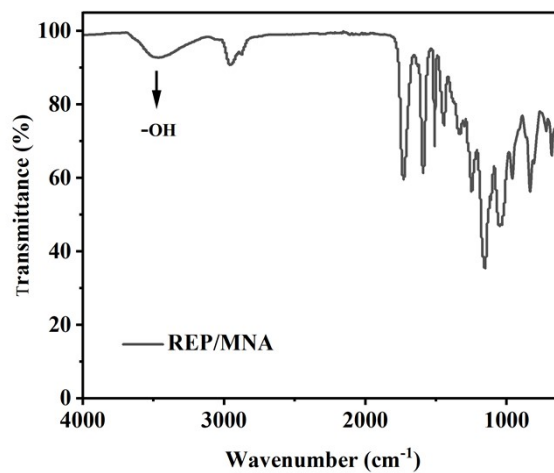

Figure S5 FTIR spectra of REP/MNA

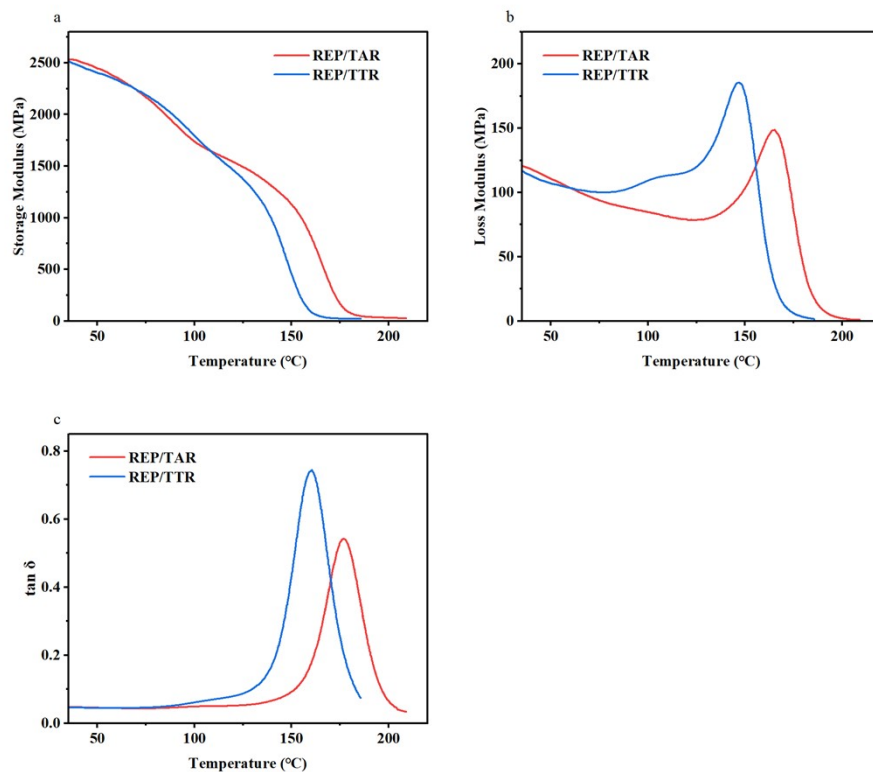

Figure S6 (a) Storage Modulus, (b) loss modulus, (c)  $\tan \delta$  curves of the epoxy thermosets from DMA test.

Table S1 DMA data of the epoxy thermosets.

| Sample  | $T_g$ (K) | $E'$ (MPa) ( $T_g + 25$ ) | $v_e$ (mol/m <sup>3</sup> ) |
|---------|-----------|---------------------------|-----------------------------|
| REP/TAR | 450       | 30.5                      | 2574                        |
| REP/TTR | 433       | 20.8                      | 1820                        |

The crosslink density ( $v_e$ ) can be calculated by the equation:  $E' = 3RTv_e$ .

$T = T_g + 25$ ,  $R = 8.314$

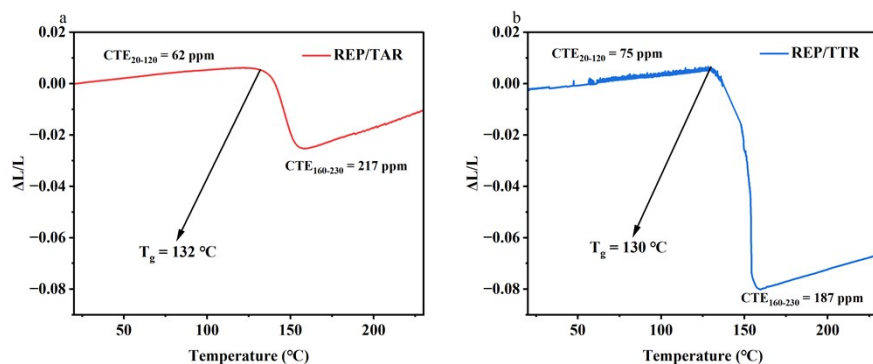

Figure S7 Thermal expansion curves of (a) REP/TAR and (b) REP/TTR from TMA test.

Table S2 Examples of conversion of vertical coordinate (REP/TAR).

| Original coordinate (TG) |          | Conversed coordinate |                              |
|--------------------------|----------|----------------------|------------------------------|
| Temperature (°C)         | Mass (%) | Temperature (°C)     | Molecular weight of one-part |
| 30                       | 100      | 30                   | 750                          |
| ...                      | ...      | ...                  | ...                          |
| 473                      | 76.4     | 473                  | 573                          |
| ...                      | ...      | ...                  | ...                          |
| 428                      | 60       | 428                  | 450                          |
| ...                      | ...      | ...                  | ...                          |

Defined the thermosets obtained by reacting 1 mol epoxy and 1 mol hardener as one part.

REP/TAR = 1 mol REP + 1 mol TAR = 396 + 354 = 750

REP/TTR = 1 mol REP + 1 mol TTR = 396 + 582 = 978

**Conversion process:** Molecular weight of one-part = Mass  $\times$  750(978)

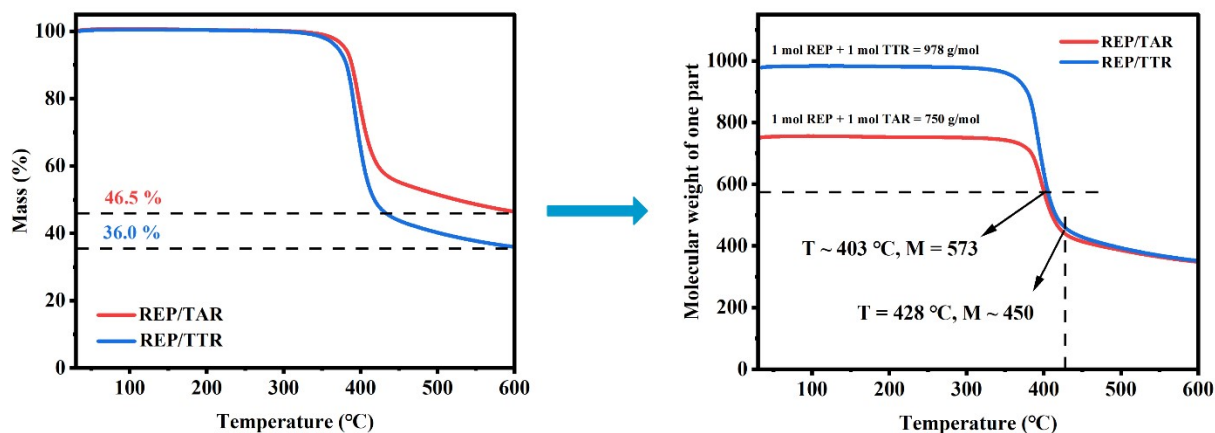

Figure S8 TG curves and Conversed curves of epoxy thermosets.

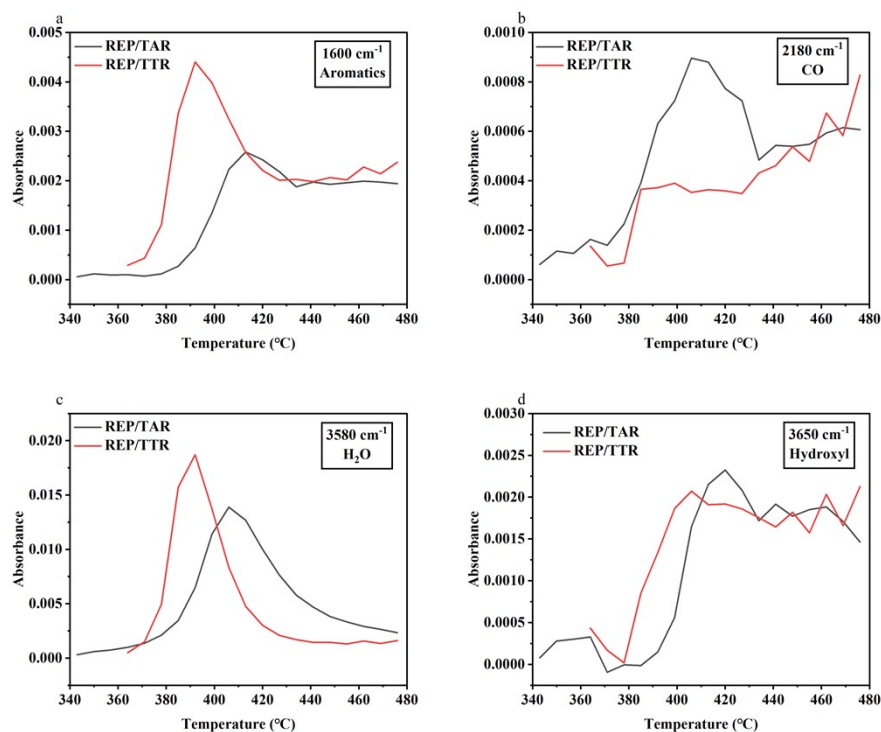

Figure S9 Absorbance intensities of characteristic peaks (at (a)  $1600\text{ cm}^{-1}$ ; (b)  $2180\text{ cm}^{-1}$ ; (c)  $3580\text{ cm}^{-1}$ ; (d)  $3650\text{ cm}^{-1}$ ) versus temperature curves of epoxy thermosets from TG-IR test.

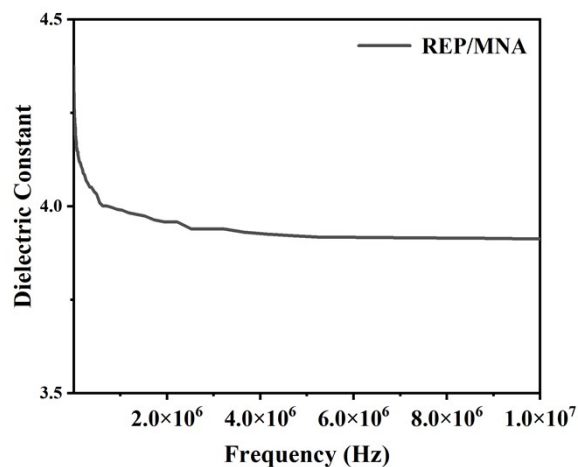

Figure S10 Dielectric constant of REP/MNA.

Table S3 Water absorptions rate of REP/TAR, REP/TTR and REP/MNA

|         | 24 h   | 48 h   | 72 h   | 96 h   | 120 h  |
|---------|--------|--------|--------|--------|--------|
| REP/TAR | 0.22 % | 0.39 % | 0.55 % | 0.66 % | 0.72 % |
| REP/TTR | 0.16 % | 0.27 % | 0.32 % | 0.35 % | 0.35 % |
| REP/MNA | 0.57 % | 0.87 % | 1.03 % | 1.20 % | 1.30 % |

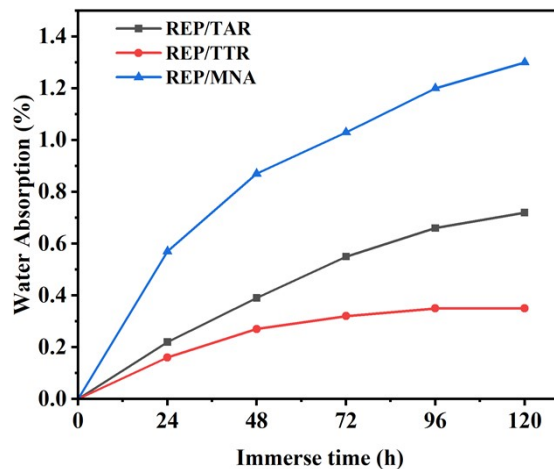

Figure S11 Water absorptions rate of REP/TAR, REP/TTR and REP/MNA.

**Preparation of REP/MNA:**

Formulation: 3.96 g REP and 2.67 g methyl nadic anhydride (MNA)

Curing condition: 110°C/2h + 140 °C/2h + 180°C/1h

REP and MNA were heated to melt and mixed with vigorous stirring for 10 min. Then, 0.5 wt% DMP-30 was added to the mixture as a cure accelerator, while stirring for 5 min. The mixtures were degassed under vacuum at 100 °C for 10 min, poured into the mold and cured at the preset temperature and time.
